# Supplementary material
Source: publisher site journal article supplement (https://www.spandidos-publications.com/5250/downloadSupplementary)

Figure S1. PIN1 absence inhibits tumor growth *in vivo*. Representative images of mice with subcutaneous tumors following inoculation of  $5 \times 10^6$  (A) LN-229 and (B) LN PIN1 KO cells. Mice necropsies of (C) LN-229 and (D) LN PIN1 KO cells. Isolated tumors with (E) LN-229 and (F) LN PIN1 KO cells. KO, knockout.

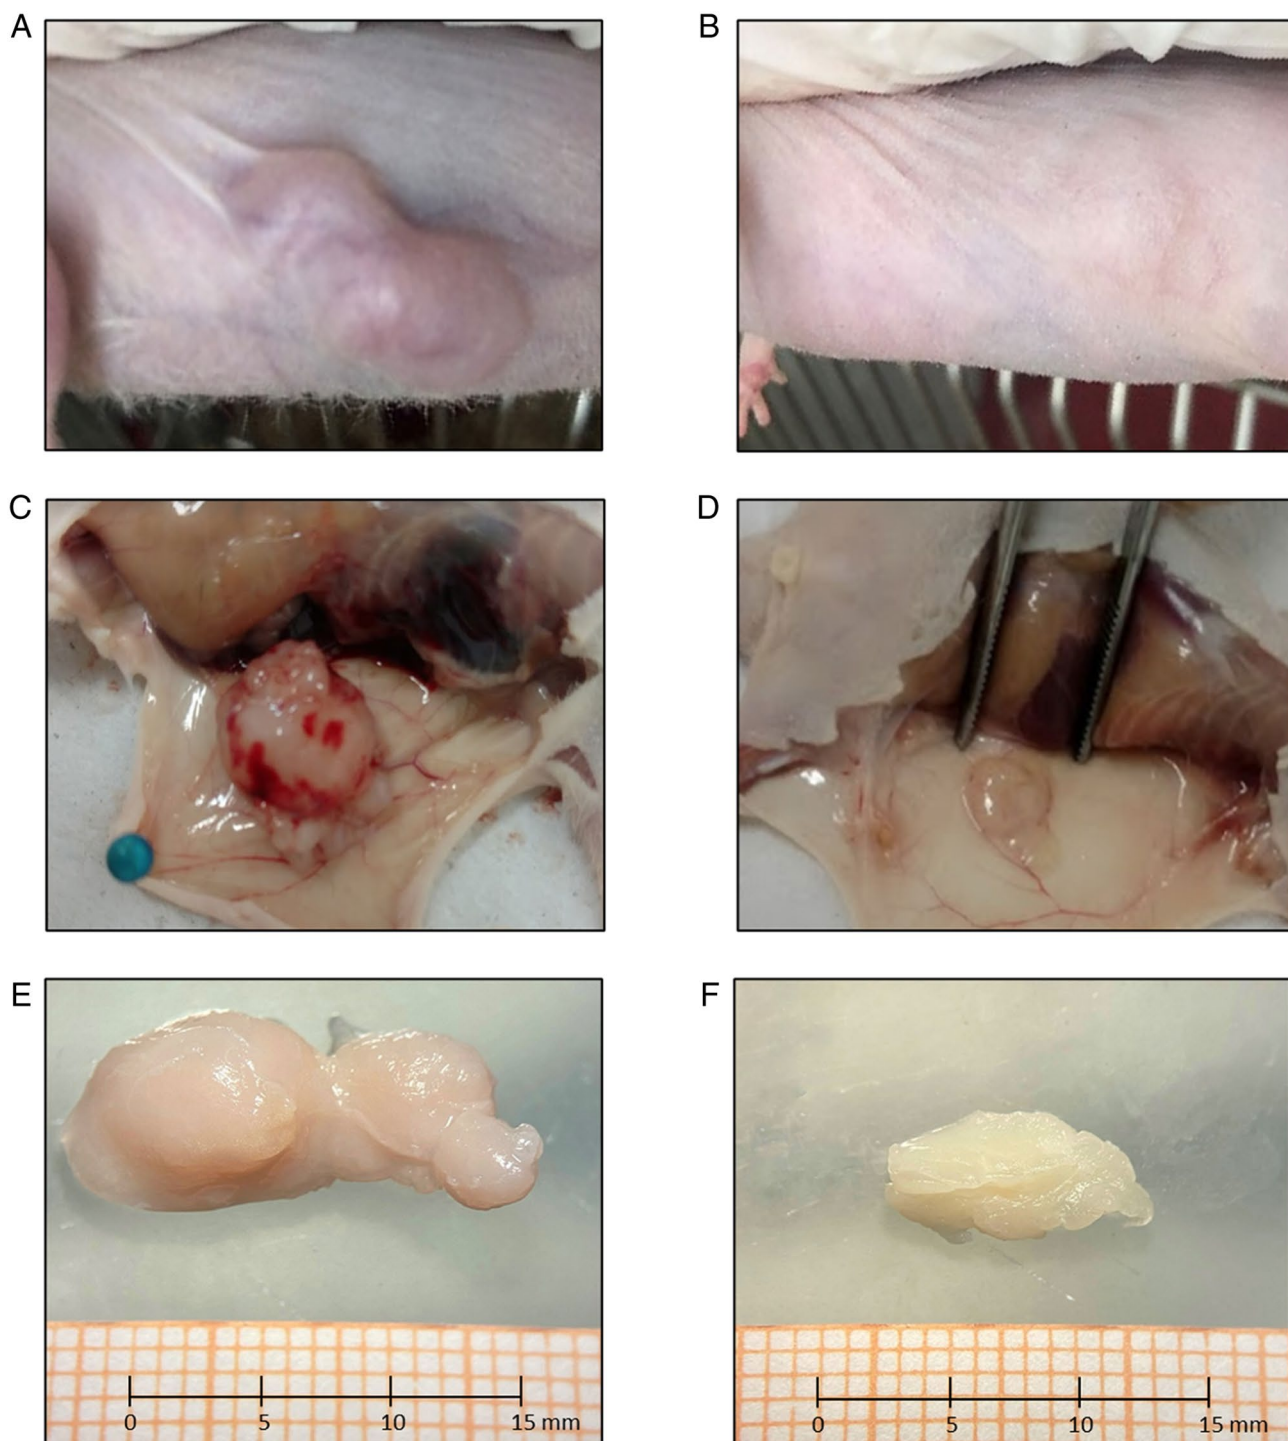

Supplement: Supplementary file 1 [file downloadSupplementary]
